# Supplementary material for: Diagnostics and Management of Pediatric Headache: An Exploratory Study among Dutch Physical Therapists
Source: MDPI journal article supplement (doi:10.3390/children10071135), 2023-06-30
Supplement: s1 [file s1]

# Questionnaire headache among children up to 18 years

The questionnaire was intended to gather various options, opinions, advice, and thoughts regarding three clinical domains: 1. diagnostic screening (anamnestic items, questionnaires), 2. physical therapeutic clinical examination, and 3. physical therapeutic management.

## Demographic data

|                                                           |                                                                                        |                                          |
|-----------------------------------------------------------|----------------------------------------------------------------------------------------|------------------------------------------|
| Gender                                                    | <input type="checkbox"/> male                                                          | <input type="checkbox"/> female          |
| Age                                                       | ..... year                                                                             |                                          |
| Nationality                                               | <input type="checkbox"/> Dutch                                                         | <input type="checkbox"/> different;..... |
| Highest education                                         | <input type="checkbox"/> BSc <input type="checkbox"/> MSc <input type="checkbox"/> PhD |                                          |
| Profession                                                | .....                                                                                  |                                          |
| Specialisation                                            | .....                                                                                  |                                          |
| Working setting                                           | <input type="checkbox"/> first-line practice                                           |                                          |
|                                                           | <input type="checkbox"/> health centre                                                 |                                          |
|                                                           | <input type="checkbox"/> general hospital                                              |                                          |
|                                                           | <input type="checkbox"/> university hospital                                           |                                          |
|                                                           | <input type="checkbox"/> rehabilitation centre                                         |                                          |
|                                                           | <input type="checkbox"/> otherwise; .....                                              |                                          |
| Estimated number of patients with headaches per month     | .....                                                                                  |                                          |
| Estimated number of children with headaches per month     | .....                                                                                  |                                          |
| Estimated number of new children with headaches per month | .....                                                                                  |                                          |
| Do you use the IHS criteria to classify headaches?        | Yes / no                                                                               |                                          |
| if not, what classification do you use?:                  | .....                                                                                  |                                          |

## 1. Diagnostic screening (a. anamnestic items, b. questionnaires)

a. Indicate how useful you find each anamnestic item during diagnostic screening to classify headaches in children.

| Classification of headache                                   | Very useful              | useful                   | Don't know               | Probably not useful      | Certainly not useful     |
|--------------------------------------------------------------|--------------------------|--------------------------|--------------------------|--------------------------|--------------------------|
| Diagnostic screening; anamnestic items                       |                          |                          |                          |                          |                          |
| Severity of headache                                         | <input type="checkbox"/> |
| Location of headache                                         | <input type="checkbox"/> |
| Type of headache (pounding, pulling, pressing, shooting,...) | <input type="checkbox"/> |
| Duration of headache                                         | <input type="checkbox"/> |
| Headache time of day                                         | <input type="checkbox"/> |
| Patient report about the course of headache                  | <input type="checkbox"/> |
| Headache frequency                                           | <input type="checkbox"/> |
| Headache increase due to activities                          | <input type="checkbox"/> |
| photophobia                                                  | <input type="checkbox"/> |
| Phonophobia                                                  | <input type="checkbox"/> |
| Nausea                                                       | <input type="checkbox"/> |
| Vomit                                                        | <input type="checkbox"/> |
| Intoxications                                                | <input type="checkbox"/> |
| Previously established classification                        | <input type="checkbox"/> |
| Family history of headache                                   | <input type="checkbox"/> |

| Classification of headache             | Very useful | useful | Don't know | Probably not useful | Certainly not useful |
|----------------------------------------|-------------|--------|------------|---------------------|----------------------|
| Diagnostic screening; anamnestic items |             |        |            |                     |                      |

|                               |                          |                          |                          |                          |                          |
|-------------------------------|--------------------------|--------------------------|--------------------------|--------------------------|--------------------------|
| Stress                        | <input type="checkbox"/> |
| School achievements           | <input type="checkbox"/> |
| High working pressure         | <input type="checkbox"/> |
| Social problems               | <input type="checkbox"/> |
| Tension at home               | <input type="checkbox"/> |
| Nxiety and panic attacks      | <input type="checkbox"/> |
| Self-reported depression      | <input type="checkbox"/> |
| Allergies                     | <input type="checkbox"/> |
| Cold complaints               | <input type="checkbox"/> |
| Vision Complaints             | <input type="checkbox"/> |
| Aura complaints               | <input type="checkbox"/> |
| Moment and duration of aura   | <input type="checkbox"/> |
| Temporomandibular dysfunction | <input type="checkbox"/> |
| Pain/sensitivity teeth        | <input type="checkbox"/> |
| Grinding/ clenching           | <input type="checkbox"/> |
| Sleep quantity                | <input type="checkbox"/> |
| Sleep quality                 | <input type="checkbox"/> |
| Other (chronic) complaints    | <input type="checkbox"/> |
| Trigger/ maintaining factors  | <input type="checkbox"/> |

b. Indicate how useful you find a headache diary and questionnaires as an addition to the diagnostic screening to classify headaches in children.

| Classification of headache                                                                                                                                                                                                                                                                  | Very useful              | useful                   | Don't know               | Probably not useful      | Certainly not useful     |
|---------------------------------------------------------------------------------------------------------------------------------------------------------------------------------------------------------------------------------------------------------------------------------------------|--------------------------|--------------------------|--------------------------|--------------------------|--------------------------|
| <b>Diagnostic screening (questionnaires)</b>                                                                                                                                                                                                                                                |                          |                          |                          |                          |                          |
| Headache diary:<br>At what time(s) of the day should it be filled in?:<br>.....<br>How long should it be kept?:<br>.....                                                                                                                                                                    | <input type="checkbox"/> |
| Questionnaires: (including headache-specific, physical activities, quality of life, pain coping, anxiety and panic, depression and sleep)<br>Which one?:.....<br>.....<br>.....<br>.....<br>.....<br>.....<br>.....<br>.....<br>.....<br>.....<br>.....<br>.....<br>.....<br>.....<br>..... | <input type="checkbox"/> |

## 2. Physical therapeutic clinical examination

Indicate how useful you find each item during physical therapeutic clinical examination to classify headaches in children.

| Classification of headache                       | Very useful              | useful                   | Don't know               | Probably not useful      | Certainly not useful     |
|--------------------------------------------------|--------------------------|--------------------------|--------------------------|--------------------------|--------------------------|
| <b>Physical therapeutic clinical examination</b> |                          |                          |                          |                          |                          |
| Neurologic examination                           | <input type="checkbox"/> |
| Measuring bloodpressure                          | <input type="checkbox"/> |
| BMI (body mass index)                            | <input type="checkbox"/> |
| Head size                                        | <input type="checkbox"/> |
| Body posture                                     | <input type="checkbox"/> |
| Head posture                                     | <input type="checkbox"/> |
| Changes, redness and swelling                    | <input type="checkbox"/> |
| Movement examination neck                        | <input type="checkbox"/> |
| Movement examination jaw                         | <input type="checkbox"/> |
| Muscle palpation                                 | <input type="checkbox"/> |
| Triggerpoints                                    | <input type="checkbox"/> |
| Intraorale inspection                            | <input type="checkbox"/> |
| Provoke headache by physical examination         | <input type="checkbox"/> |
| Provoke other complaints by physical examination | <input type="checkbox"/> |
| Other physical examination tests?:.....          | <input type="checkbox"/> |

**3. Physical therapeutic management** For each physical therapeutic management item, indicate a score for its potential usefulness in treating children with headaches. In other words, do you expect to obtain a positive result with this intervention in reducing headaches and / or the consequences of this?

| Physical therapeutic management               | Very useful              | useful                   | Don't know               | Probably not useful      | Certainly not useful     |
|-----------------------------------------------|--------------------------|--------------------------|--------------------------|--------------------------|--------------------------|
| <b>(in alphabetical order)</b>                |                          |                          |                          |                          |                          |
| Biofeedback                                   | <input type="checkbox"/> |
| Cognitive behavioral therapy                  | <input type="checkbox"/> |
| Dry-needling                                  | <input type="checkbox"/> |
| Habit reversal training                       | <input type="checkbox"/> |
| Headache education                            | <input type="checkbox"/> |
| Posture treatment                             | <input type="checkbox"/> |
| Hypnose                                       | <input type="checkbox"/> |
| Lifestyle coaching                            | <input type="checkbox"/> |
| Manipulation neck                             | <input type="checkbox"/> |
| Massage and stretching                        | <input type="checkbox"/> |
| Mobilisation Neck                             | <input type="checkbox"/> |
| Meditation                                    | <input type="checkbox"/> |
| Occlusal appliances                           | <input type="checkbox"/> |
| Exercise treatment by non-physical therapists | <input type="checkbox"/> |
| Exercise treatment by physical therapists     | <input type="checkbox"/> |
| Pain education                                | <input type="checkbox"/> |

| Physical therapeutic management                                                                                 | Very useful              | useful                   | Don't know               | Probably not useful      | Certainly not useful     |
|-----------------------------------------------------------------------------------------------------------------|--------------------------|--------------------------|--------------------------|--------------------------|--------------------------|
| (in alphabetical order)                                                                                         |                          |                          |                          |                          |                          |
| Relaxation treatment                                                                                            | <input type="checkbox"/> |
| Sleep hygiene                                                                                                   | <input type="checkbox"/> |
| Selfmonitoring                                                                                                  | <input type="checkbox"/> |
| Complementary treatments:<br>.....<br>.....                                                                     | <input type="checkbox"/> |
| Other treatment interventions in children with headaches, which have not yet been mentioned?:<br>.....<br>..... | <input type="checkbox"/> |
